# Supplementary material for: High-Risk Nonsteroidal Anti-inflammatory Drug Prescribing: Variation by Documentation of Chronic Kidney Disease Status
Source: Research Square preprint supplement (doi:10.21203/rs.3.rs-7792064/v1), 2025-12-01
Supplement: Supplementary file 1 [file 607db715c2b74711d6e13cb7.docx]

**Appendix**

**Title: High-Risk Nonsteroidal Anti-inflammatory Drug Prescribing: Variation by Documentation of Chronic Kidney Disease Status**

**Authors:**

Isaiah Yim, BS1, Monica Ahrens, PhD2, YingXing Wu, MD, MS3, John W. Epling, MD, MSEd1,4, Michelle S. Rockwell, PhD1,4

1-Virginia Tech Carilion School of Medicine, Roanoke, VA

2-Department of Statistics, Virginia Tech, Roanoke, VA

3-Health Analytics Research, Carilion Clinic, Roanoke VA

4- Department of Family and Community Medicine, Carilion Clinic, Roanoke, VA

**Corresponding Author:**

Michelle Rockwell, PhD

Department of Family & Community Medicine, Carilion Clinic

Virginia Tech Carilion School of Medicine

Roanoke, VA, USA

[msrock@vt.edu](mailto:msrock@vt.edu)

**Appendix Table 1. Chronic Kidney Disease Diagnosis Codes**

| **ICD-9** | 403.0, 403.01, 403.10, 403.11, 403.90, 403.91, 404.0, 404.01, 404.02, 404.03, 404.10, 404.11, 404.12, 404.13, 404.9, 404.91, 404.92, 404.93, 404.3, 585.3, 585.4, 585.5, 585.6, 585.9, 586.0 |
| --- | --- |
| **ICD-10** | I12.0, I12.9, I13.0, I13.1, I13.10, I13.11, I13.2  N18.3, N18.30, N18.31, N18.32, N18.4, N18.5, N18.6, N18.9, N19 |

ICD= International Classification of Diseases

**Appendix Table 2. Nonsteroidal Anti-Inflammatory Drugs and Corresponding RxNorm Codes**

| **RxNorm Code** | **Drug Name** |
| --- | --- |
| 140587 | celecoxib |
| 3355 | diclofenac |
| 3393 | difusinal |
| 24605 | etodolac |
| 4331 | fenoprofen |
| 4502 | flurbiprofen |
| 5640 | ibuprofen |
| 5781 | indomethacin |
| 6142 | ketoprofen |
| 35827 | ketorolac |
| 588003 | meclofenamate |
| 6678 | meclofenamic acid |
| 257844 | mefenamate |
| 41493 | meloxicam |
| 236908 | methyl butetisalicylate |
| 236348 | morpholine salicylate |
| 31448 | nabumetone |
| 7258 | naproxen |
| 32613 | oxaprozin |
| 8356 | piroxicam |
| 232158 | rofecoxib |
| 10237 | sulindac |
| 38866 | trolamine salicylate |
| 278567 | valdecoxib |
| 9518 | salacylamide |
